# Supplementary material
Source: PubMed Central journal article supplement (PMC3587195)
Supplement: 1222732110_pnas.201222732SI.pdf [file 1222732110_pnas.201222732SI.pdf]

# Supporting Information

Bilguvar et al. 10.1073/pnas.1222732110

## SI Text: Clinical Histories and Physical Examination Results

**NG 1024-3.** The neurological history is limited due to the parents being poor historians and the lack of records kept by them. The patient is a 34-y-old woman who is the eldest of six siblings. She is a product of an uncomplicated, term vaginal labor, and she reached early developmental milestones. The first abnormality was noticed by her parents at 5 y of age when she developed balance problems. At age 6, they recognized a decrease in her vision. When she started school at 7 y of age, her teachers noticed that she leaned over onto her notebooks while reading and writing and documented decreased vision. She first presented to a pediatric neurology clinic when she was 10 y of age. At that time, a full neurological examination was documented. She was awake, alert, cooperative, and oriented. Her IQ score was found to be 71. Visual acuity was 20/50 bilaterally, and optic atrophy and rotatory nystagmus were documented. Otherwise, the examination of cranial nerves was normal. Muscle strength was normal, although muscle tone was increased in the lower extremities, with hyperpatellar reflexes and bilateral positive Babinski response. Sensory examination was normal and her gait was ataxic. Her history is also remarkable for documented seizures, and she was found to have generalized 3.5- to 4-Hz spike activity on EEGs and was started on valproic acid, which she continues to take to date. Her last seizure was within 1 mo of this writing. Her current neurological examination is summarized in Table S1.

**NG 1024-2.** The patient is a 33-y-old woman who is the product of an uncomplicated, term labor through vaginal delivery. Similar to her older sister, she started to lean over close to her notebooks at 7 y of age. Over the next 2 y, she had progressive vision loss. Her first neurological examination was documented when she was 9 y of age. Her IQ was 74. She was awake, alert, cooperative, and oriented. Visual acuity was significantly diminished, and she could

only count fingers from near distance. Bilateral optic atrophy and rotatory nystagmus were documented. Although muscle strength was normal, increased tone and hyperreflexia of her lower extremity were noticed. There was a positive Babinski response only on the right. She was found to have significant ataxia. All cerebellar tests were abnormal. Position sense in her lower extremities was found to be diminished, and the Romberg sign was borderline abnormal. Her current neurological examination is summarized in Table S1.

**NG 1024-1.** The patient is a 28-y-old man who is the product of an uncomplicated, term vaginal labor. His first neurological examination was documented when he was 4 y of age. Although the parents did not detect any abnormalities, when he was screened due to the findings in his two elder sisters, he was found to have early bilateral optical atrophy, nystagmus, and pyramidal tract abnormalities (not further documented). The findings of his current neurological examination are shown in Table S1.

**Formal Visual Examination Results.** In all patients, visual acuity was limited to light sense in both eyes. Intraocular pressure was 15 mmHg in both eyes (except that it was 16 mmHg for the left eye in NG 1024-1). Anterior segment examination was remarkable for vertical rotator nystagmus of both eyes, pupils were mid-dilated, and direct light response was weak; peripheral cortical annular type punctuate lens opacifications were noted. Fundus examination revealed bilateral optic atrophy; retinal vessels and macula were normal. Flash visual-evoked potentials revealed diminished response in both eyes. A full-field electroretinogram revealed normal photopic and scotopic responses of both eyes. The examinations were noted to be consistent with hereditary optic atrophy.

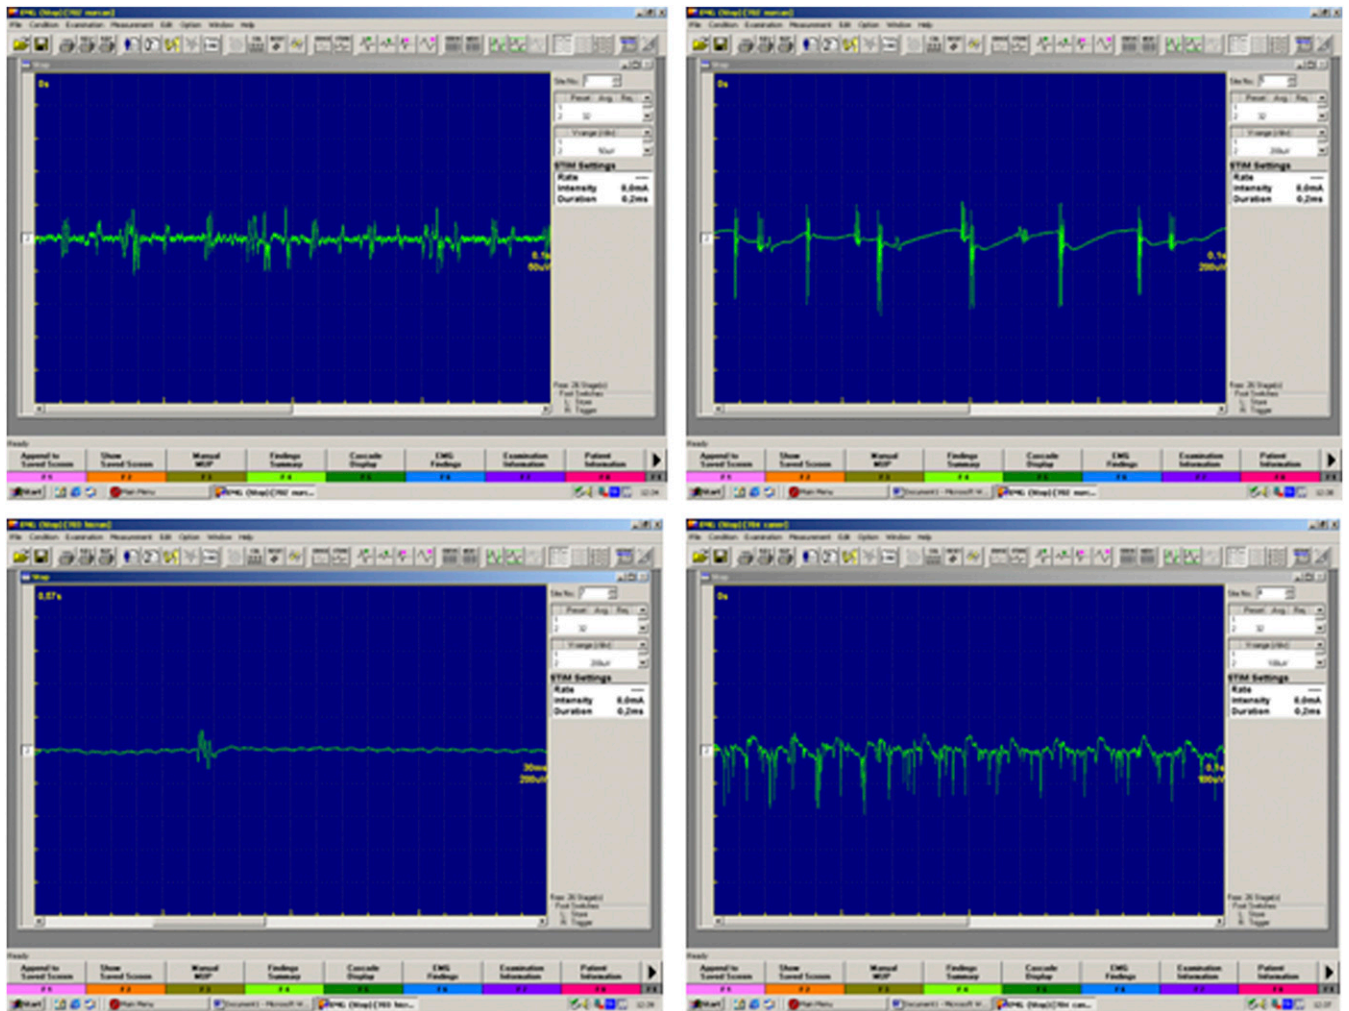

**Fig. S1.** EMG tests (*Upper*) Screen captures of right deltoid muscle EMG test in NG1024-2. Irregular single, double, or triple spontaneous 50- to 100- $\mu$ V myokymic discharges that lead to visible muscle contractions are observed. (*Right*) Enlarged trace. (*Lower*) Screen captures of EMG tests in NG 1024-3 (*Left*) and NG 1024-1 (*Right*). For NG 1024-3, right deltoid muscle needle EMG shows infrequent, irregular spontaneous 100- $\mu$ V myokymic activity. For NG 1024-1, the needle EMG of the gastrocnemius muscle is remarkable for frequent, repetitive fasciculation-like 200- to 300- $\mu$ V myokymic discharges. For all three patients, upper and lower extremity motor (median, ulnar, and tibial) and sensory (median, ulnar, and sural) nerve conduction velocities and response amplitudes have been found to be within normal levels.





**Table S1. Neurological examination findings**

| Clinical status             | NG 1024-1           | NG 1024-2           | NG 1024-3           |
|-----------------------------|---------------------|---------------------|---------------------|
| Age at exam/year born       | 28/1983             | 33/1978             | 34/1977             |
| Vision                      | –                   | –                   | –                   |
| Standing without assistance | –                   | –                   | –                   |
| Nystagmus (all directions)  | +                   | +                   | +                   |
| Titubation                  | +                   | +                   | +                   |
| Deep tendon reflexes        | UE (++)<br>LE (+++) | UE (++)<br>LE (+++) | UE (++)<br>LE (+++) |
| Babinski/Hoffman responses  | +/+                 | +/-                 | +/-                 |
| Muscle strength             | UE 5/5<br>LE 4/5    | UE 5/5<br>LE 4/5    | UE 5/5<br>LE 4/5    |
| Clonus                      | –                   | –                   | –                   |
| Superficial sensation       | Normal              | Normal              | Normal              |
| Positional sense            | Normal              | Normal              | Normal              |
| Vibration (UE/LE, s)*       | 15/10               | 6/4                 | 10/7                |
| Spasticity                  | ++                  | +++                 | +                   |
| Cerebellar tests, dysmetria | Abnormal            | Abnormal            | Abnormal            |
| Myotonia                    | +                   | –                   | –                   |

LE, lower extremity; UE, upper extremity; –, absent; +, present; ++, more present; +++, most present.

\*Expected to last for 20 s; shorter responses associated with dorsal column dysfunction.

**Table S2. DTI measurements of the optic pathways in patients versus age-matched controls**

| Subject   | Value            | Right optic tract      | Left optic tract       |
|-----------|------------------|------------------------|------------------------|
| NG 1024-1 | ADC              | $0.99 \times 10^{-3}$  | $0.97 \times 10^{-3}$  |
|           | FA               | 0.478                  | 0.505                  |
|           | Number of voxels | 251                    | 211                    |
| NG 1024-2 | ADC              | $1.01 \times 10^{-3}$  | $1.12 \times 10^{-3}$  |
|           | FA               | 0.446                  | 0.414                  |
|           | Number of voxels | 556                    | 401                    |
| NG 1024-3 | ADC              | $0.91 \times 10^{-3}$  | $0.88 \times 10^{-3}$  |
|           | FA               | 0.525                  | 0.565                  |
|           | Number of voxels | 389                    | 350                    |
| Control 1 | ADC              | $0.776 \times 10^{-3}$ | $0.787 \times 10^{-3}$ |
|           | FA               | 0.596                  | 0.573                  |
|           | Number of voxels | 372                    | 340                    |
| Control 2 | ADC              | $0.813 \times 10^{-3}$ | $0.791 \times 10^{-3}$ |
|           | FA               | 0.589                  | 0.569                  |
|           | Number of voxels | 342                    | 298                    |
| Control 3 | ADC              | $0.798 \times 10^{-3}$ | $0.787 \times 10^{-3}$ |
|           | FA               | 0.553                  | 0.574                  |
|           | Number of voxels | 333                    | 371                    |

An increase in ADC and a decrease in FA is consistent with Wallerian degeneration of the optic tracts. ADC, apparent diffusion coefficient; FA, fraction anisotropy.

**Table S3. Intervals of shared homozygosity between the three affected individuals of family NG 1024**

| Chromosome | Start*      | End*        | SNP start | SNP end    | Number of SNPs | Length (cM) | Length (kb) |
|------------|-------------|-------------|-----------|------------|----------------|-------------|-------------|
| 4          | 38,187,084  | 49,061,848  | rs586844  | rs12696828 | 905            | 9.75        | 10,874.76   |
| 6          | 44,575,446  | 53,593,569  | rs472029  | rs4493745  | 804            | 7.62        | 9,018.12    |
| 8          | 39,869,633  | 43,791,691  | rs2981156 | rs10958798 | 224            | 3.13        | 3,922.05    |
| 11         | 114,223,577 | 117,570,851 | rs2852450 | rs603377   | 351            | 5.44        | 3,347.27    |
| Total      |             |             |           |            | 2,284          | 25.93       | 27,162.20   |

\*NCBI37/hg19.

**Table S4. Coverage distributions and error rates across the whole exome and shared exomic homozygosity intervals of NG 1024-3**

| Parameter                                    | Value       |
|----------------------------------------------|-------------|
| Number of lanes                              | 1           |
| Read type                                    | Single read |
| Read length                                  | 74          |
| Total number of reads (millions)             | 37.96       |
| Percent mapped to the genome                 | 98.3        |
| Exome                                        |             |
| Percent mapped to the exome                  | 62.87       |
| Mean coverage                                | 51.84       |
| Percent of bases covered at least four times | 96.87       |
| Mean error rate (%)                          | 1.14        |
| Second base error rate (%)                   | 0.29        |
| Last base error rate (%)                     | 2.31        |
| Shared exomic homozygosity intervals         |             |
| Interval size (kb)                           | 297         |
| Percent mapped to the interval               | 0.55        |
| Mean coverage                                | 51.85       |
| Percent of bases covered at least four times | 98.99       |
| Mean error rate (%)                          | 0.97        |
| Second base error rate (%)                   | 0.26        |
| Last base error rate (%)                     | 1.75        |

**Table S5. Previously unreported homozygous variants identified within the shared exomic homozygosity intervals of NG 1024**

| Chromosome | Position*   | Base change | Quality score | Coverage | Unique nonreference allele coverage | Unique reference allele coverage | Gene          | Status   | Amino acid change | Amino acid position | PhyloP |
|------------|-------------|-------------|---------------|----------|-------------------------------------|----------------------------------|---------------|----------|-------------------|---------------------|--------|
| 4          | 41,259,013  | A to C      | 202           | 54       | 35                                  | 0                                | <i>UCLH1</i>  | Missense | GLU7ALA           | 7/223               | 3.888  |
| 11         | 116,658,654 | G to A      | 45            | 7        | 5                                   | 0                                | <i>ZNF259</i> | Missense | PRO18LEU          | 18/459              | 2.654  |

\*NCBI37/hg1.

**Table S6. Binding and thermodynamic parameters for UCHL1<sup>WT</sup>, UCHL1<sup>GLU7ALA</sup>, UCHL1<sup>CYS90SER</sup>, and UCHL1<sup>ILE93MET</sup>**

| Parameters                                             | UCHL1 <sup>WT</sup> | UCHL1 <sup>GLU7ALA</sup> | UCHL1 <sup>CYS90SER</sup> | UCHL1 <sup>ILE93MET</sup> |
|--------------------------------------------------------|---------------------|--------------------------|---------------------------|---------------------------|
| $K_d$ (nM)                                             | 85 ± 31             | 646 ± 288                | 32 ± 6                    | 29 ± 5                    |
| $n$                                                    | 0.77 ± 0.02         | 0.18 ± 0.03              | 0.65 ± 0.06               | 0.58 ± 0.01               |
| $\Delta H$ (cal·mol <sup>-1</sup> )                    | -5,446 ± 498        | -8,268 ± 1,812           | -6,307 ± 539              | -5,226 ± 200              |
| $\Delta S$ (cal·mol <sup>-1</sup> ·deg <sup>-1</sup> ) | 14 ± 2              | 1 ± 7                    | 13 ± 2                    | 17 ± 1                    |

 $K_d$ , dissociation constant;  $n$ , binding stoichiometry;  $\Delta H$ , change in enthalpy;  $\Delta S$ , change in entropy.
